# Supplementary material for: The epidemiology and severity of scorpion envenoming in South Africa as managed by the Tygerberg Poisons Information Centre over a 10 year period
Source: PubMed Central journal article supplement — Afr J Emerg Med. 2019 Feb 4;9(1):21–4. doi: 10.1016/j.afjem.2018.12.003 (PMC6399994; doi:10.1016/j.afjem.2018.12.003), 2019-02-04
Supplement: mmc1.pdf [file mmc1.pdf]

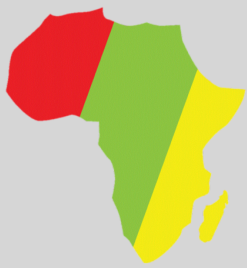

# African Journal of Emergency Medicine

Additional material form

---

Please complete all relevant fields

Manuscript title

---

## African Relevance

(African relevance is a short collection of bullet points that convey the relevance of the article in the African context. Please include 3 to 5 bullet points (maximum 85 characters per bullet point including spaces).

Click to see [examples](#).

- 
- 
- 
- 
- 

---

## Dissemination of results

(Not required for review articles, practical pearls, concepts, editorials, correspondence and erratum- simply state: not required in box below)

Provide a brief statement on how findings of this research were disseminated to the community from, or within which it was collected.

Example: Results from this study (research/ trail/ etc.) was shared with staff members at AAA hospital emergency centre through an informal presentation. The results were also published in the hospital's newsletter.

Write in box

---

## Author contribution

Please provide a brief statement to describe the contributions of authors. Please note that according to the ICMJE an author should fulfil **all** of the following criteria:

- Substantial contributions to the conception or design of the work; or the acquisition, analysis, or interpretation of data for the work **AND**
- Drafting the work or revising it critically for important intellectual content **AND**
- Final approval of the version to be published **AND**
- Agreement to be accountable for all aspects of the work in ensuring that questions related to the accuracy or integrity of any part of the work are appropriately investigated and resolved.

Example: AB and BC conceived the original idea. AB and CD designed the experiments and collected the data. AB carried out analysis of data. AB and CD drafted the manuscript and BC revised it. AB, BC and CD approved the final version that was submitted - *note that authors' names are shortened to initials only*

Write in box

---

Submit the completed form along with your completed manuscript where prompted by EVISE
